# Supplementary material
Source: MDPI journal article supplement (https://www.mdpi.com/2073-4395/12/2/283)
Supplement: s1 [file s1]

## Supplementary information

### Tables

**Table S1.** Assignment of bands and/or peaks of the main vibration modes and functional groups of FTIR spectra according to Zhang et al.[7], Das et al. [47] and De Souza and Braganca [46].

| Absorption frequency (cm <sup>-1</sup> ) | Vibration mode                        | Group                                                       |
|------------------------------------------|---------------------------------------|-------------------------------------------------------------|
| 3600-3500                                | H-OH stretch                          | Hygroscopic water                                           |
| 3410-3385                                | O-H stretch                           | Phenolic compound, hydroxy group                            |
| 2930-2920                                | C-H stretch                           | Aliphatic compound                                          |
| 1720                                     | C = O stretch                         | Carboxyl, aldehyde, ketone                                  |
| 1650-1640                                | C = O stretch                         | Amino compound, carboxylate                                 |
| 1630-1600                                | C = C stretch                         | Aromatic ring, alkene                                       |
| 1570-1500                                | N-H and OH deformation, C = N stretch | Amino compounds and secondary amides                        |
| 1515-1510                                | Aromatic C = C stretch                | Lignin                                                      |
| 1460-1440                                | C-H stretch                           | Aliphatic CH deformation                                    |
| 1420-1410                                | O-H OH deformation, C-O stretch       | Aromatic oxide, phenol                                      |
| 1350-1384                                | C-H stretch                           | Symmetric deformation vibration of C-H of C-CH <sub>3</sub> |
| 1320                                     | C-N stretch                           | First, second aromatic amine                                |
| 1240-1220                                | C-O stretch, OH deformation           | Carboxyl                                                    |
| 1080-1030                                | C-O stretch                           | Polysaccharides or aromatic ethers                          |
| 880-750                                  | C-H stretch                           | Aromatic CH out of plane deformation                        |

**Table S2** Effects of amendments on the relative intensities of the main absorption peaks of FTIR spectra of HAs

| Treatment<br>(Site) | 2920 cm <sup>-1</sup> | 2850 cm <sup>-1</sup> | 1720 cm <sup>-1</sup> | 1630 cm <sup>-1</sup> | I2920/I1720 | I2920/I1620 |
|---------------------|-----------------------|-----------------------|-----------------------|-----------------------|-------------|-------------|
| T1 (S1)             | 0.21 ± 0.05           | 0.15 ± 0.06           | 0.80 ± 0.04           | 0.85 ± 0.13           | 0.27 ± 0.07 | 0.25 ± 0.03 |
| T2 (S1)             | 0.17 ± 0.05           | 0.11 ± 0.05           | 0.74 ± 0.09           | 0.85 ± 0.10           | 0.24 ± 0.06 | 0.21 ± 0.05 |
| T3 (S1)             | 0.20 ± 0.04           | 0.14 ± 0.06           | 0.76 ± 0.07           | 0.87 ± 0.07           | 0.27 ± 0.07 | 0.23 ± 0.03 |
| T4 (S1)             | 0.24 ± 0.04           | 0.17 ± 0.03           | 0.82 ± 0.08           | 0.83 ± 0.14           | 0.29 ± 0.02 | 0.30 ± 0.11 |
| T5 (S1)             | 0.25 ± 0.06           | 0.19 ± 0.04           | 0.83 ± 0.09           | 0.87 ± 0.11           | 0.30 ± 0.03 | 0.30 ± 0.11 |
| T6 (S1)             | 0.27 ± 0.05           | 0.21 ± 0.05           | 0.83 ± 0.05           | 0.88 ± 0.11           | 0.33 ± 0.06 | 0.32 ± 0.05 |
| T7 (S2)             | 0.18 ± 0.02           | 0.10 ± 0.00           | 0.72 ± 0.09           | 0.84 ± 0.02           | 0.25 ± 0.01 | 0.21 ± 0.02 |
| T8 (S2)             | 0.27 ± 0.05           | 0.20 ± 0.04           | 0.82 ± 0.07           | 0.90 ± 0.00           | 0.33 ± 0.04 | 0.30 ± 0.05 |
| T9 (S3)             | 0.21 ± 0.02           | 0.14 ± 0.01           | 0.80 ± 0.04           | 0.88 ± 0.07           | 0.26 ± 0.02 | 0.24 ± 0.05 |
| T10 (S3)            | 0.27 ± 0.05           | 0.20 ± 0.04           | 0.82 ± 0.07           | 0.90 ± 0.00           | 0.33 ± 0.04 | 0.30 ± 0.05 |
| T11 (S4)            | 0.19 ± 0.05           | 0.13 ± 0.05           | 0.85 ± 0.03           | 0.87 ± 0.11           | 0.22 ± 0.07 | 0.22 ± 0.05 |
| T12 (S4)            | 0.20 ± 0.05           | 0.14 ± 0.05           | 0.90 ± 0.01           | 0.86 ± 0.12           | 0.22 ± 0.05 | 0.23 ± 0.03 |
| LSD <sub>0.05</sub> | 0.13                  | 0.13                  | 0.19                  | 0.28                  | 0.14        | 0.18        |

Values represent mean ± standard deviation; n = 3; n.s. – not significant; LSD – least significant difference; Tn – treatment number: T1 – farmyard manure (FYM, with field age of 0.5 years), T2 – brown coal waste (BCW, 0.5 years), T3 – biochar (BIO, 0.5 years), T4 – FYM (1.5 years), T5 – BCW (1.5 years), T6 – BIO (1.5 years), T7 – no amendment (8 years), T8 – BIO (8 years), T9 – no amendment (94 years), T10 – FYM + Ca (94 years), T11 – no amendment (116 years) and, T12 – FYM (116 years).

**Figure**

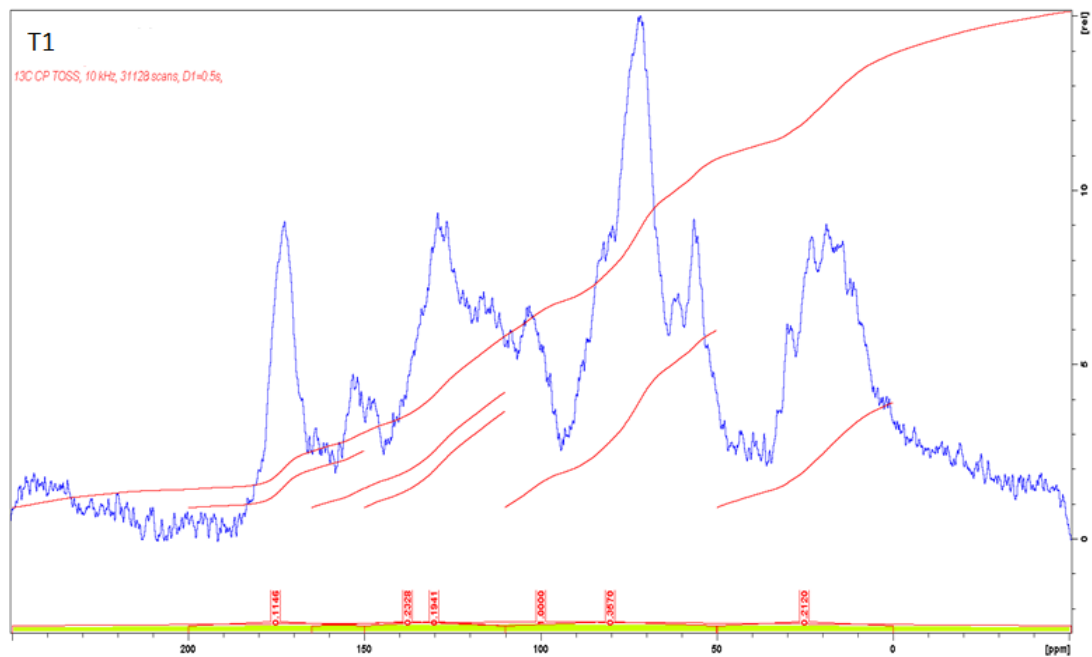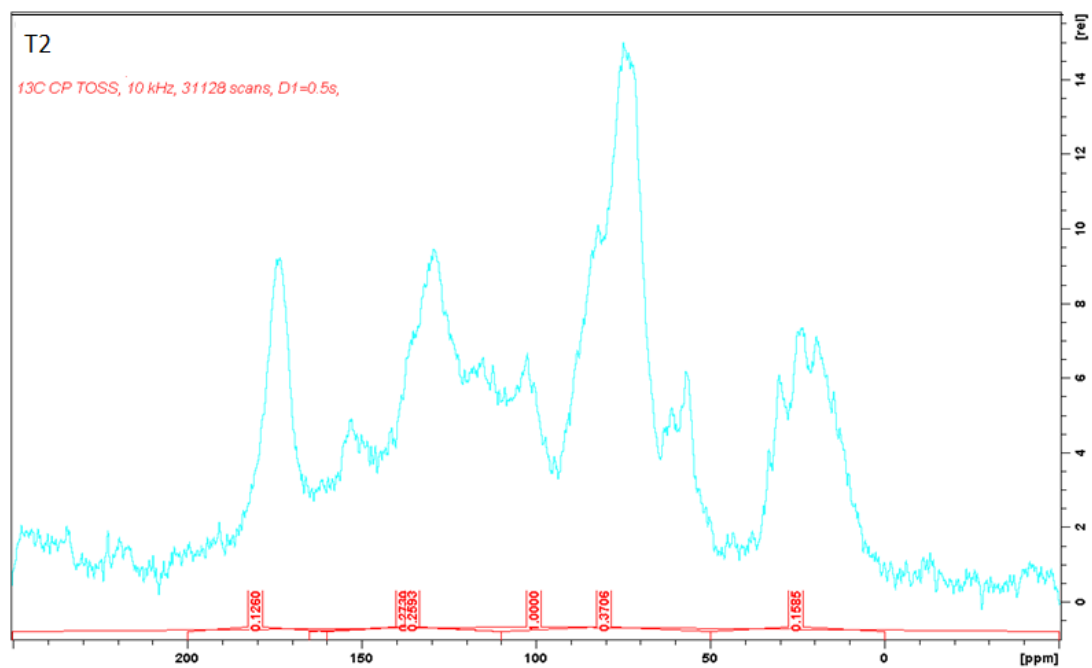

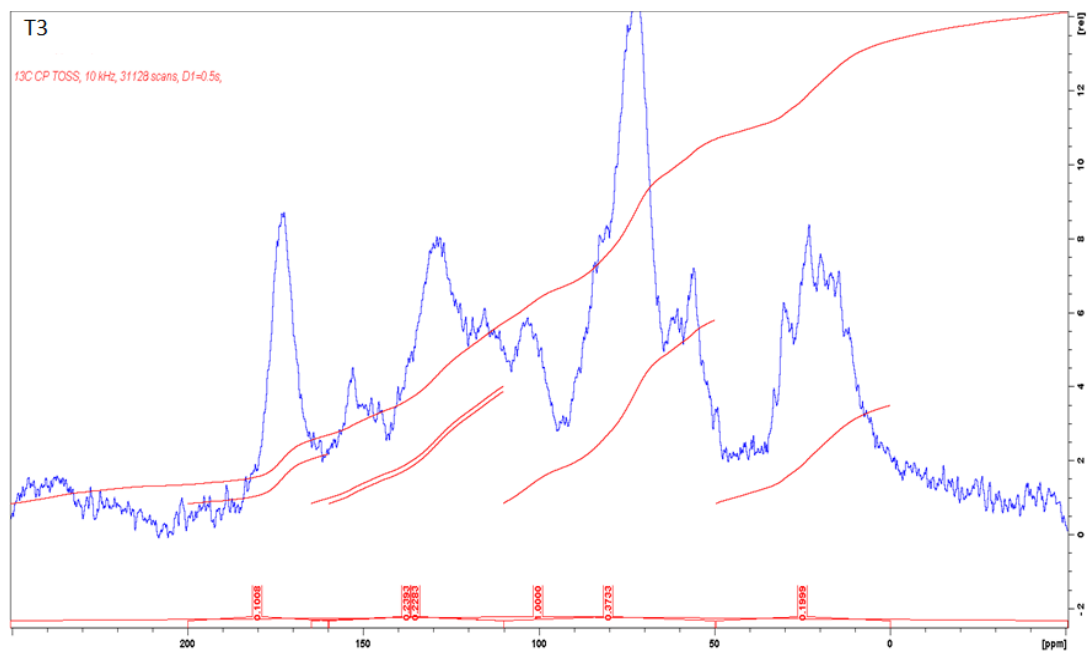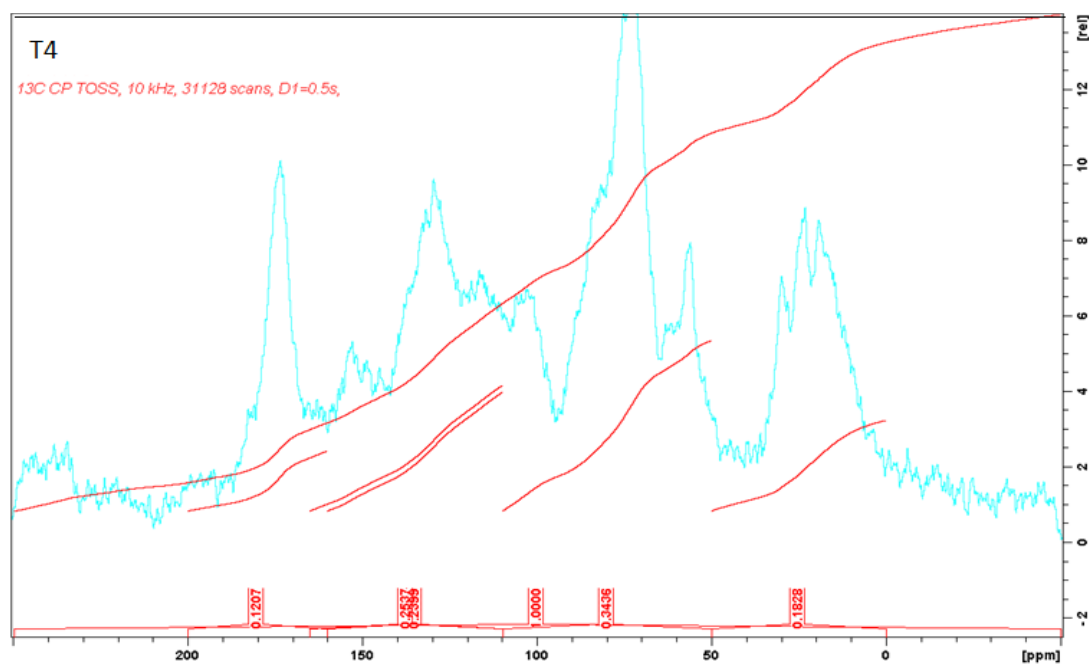

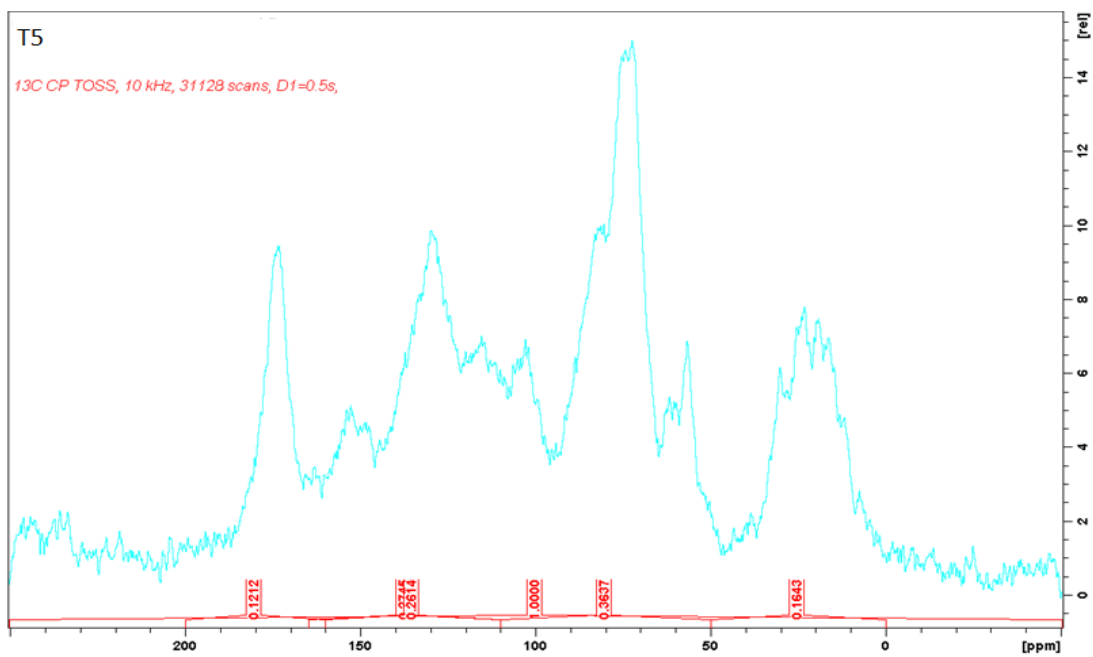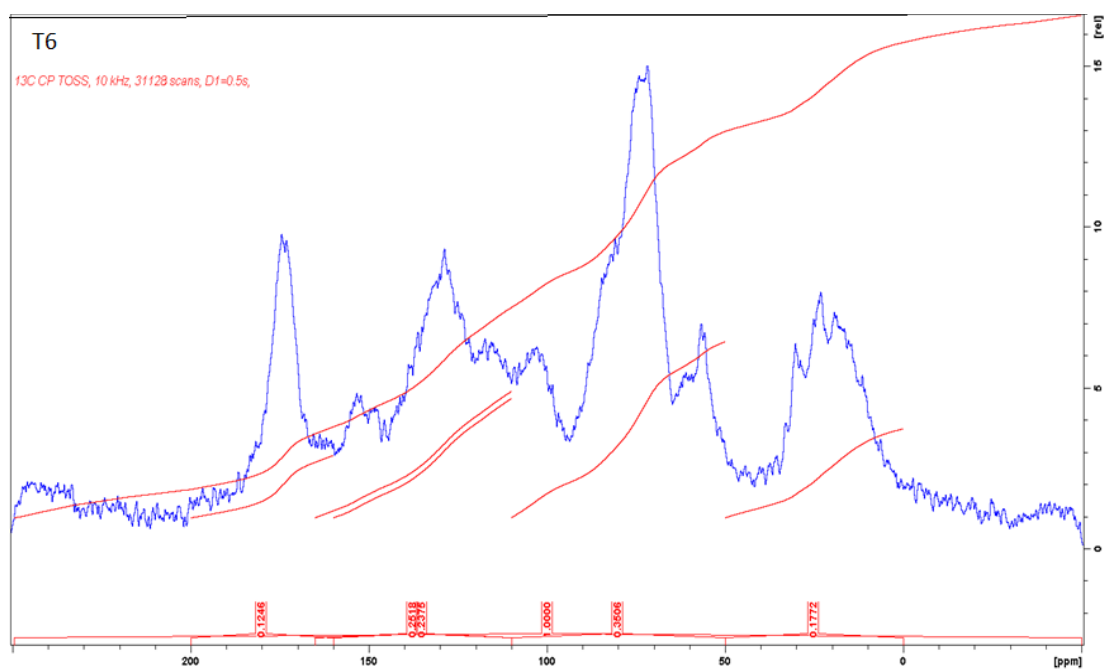

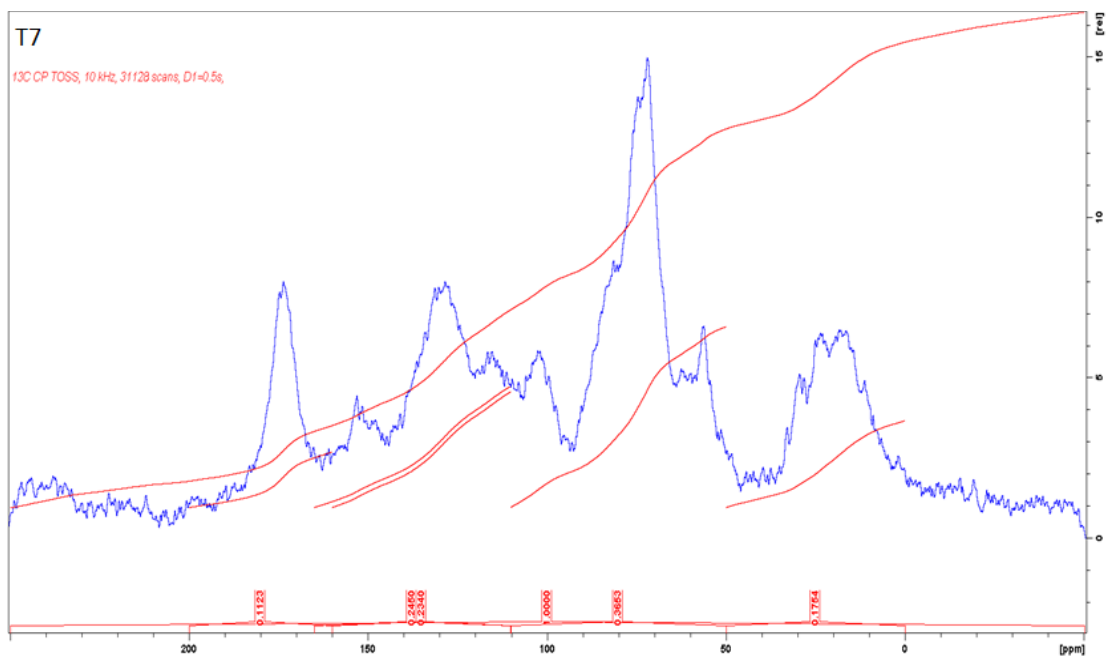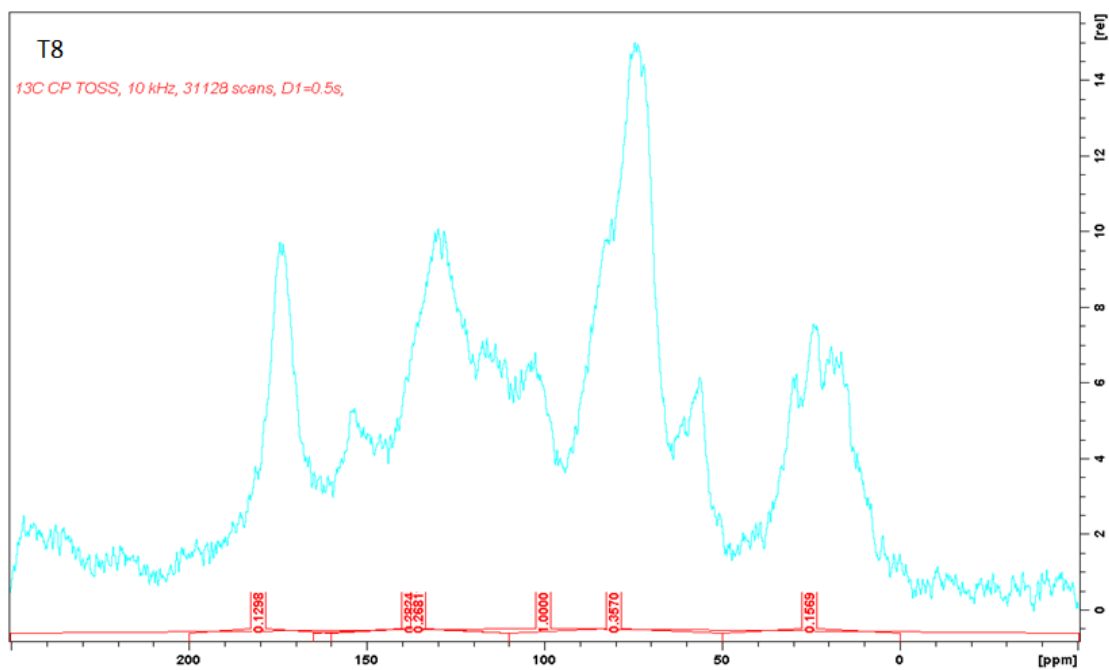

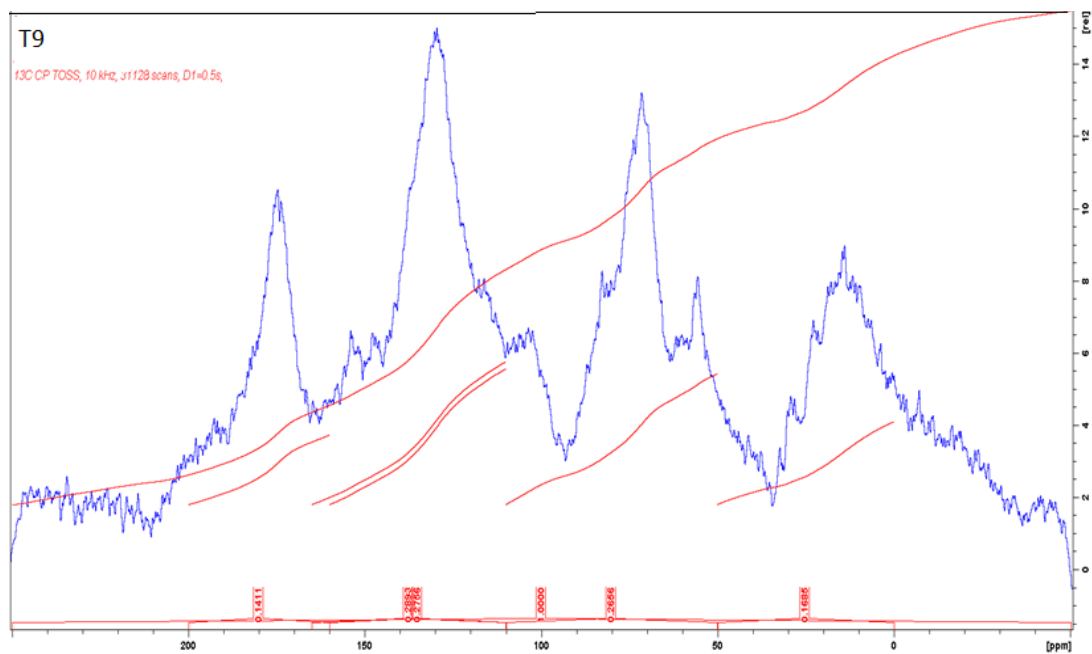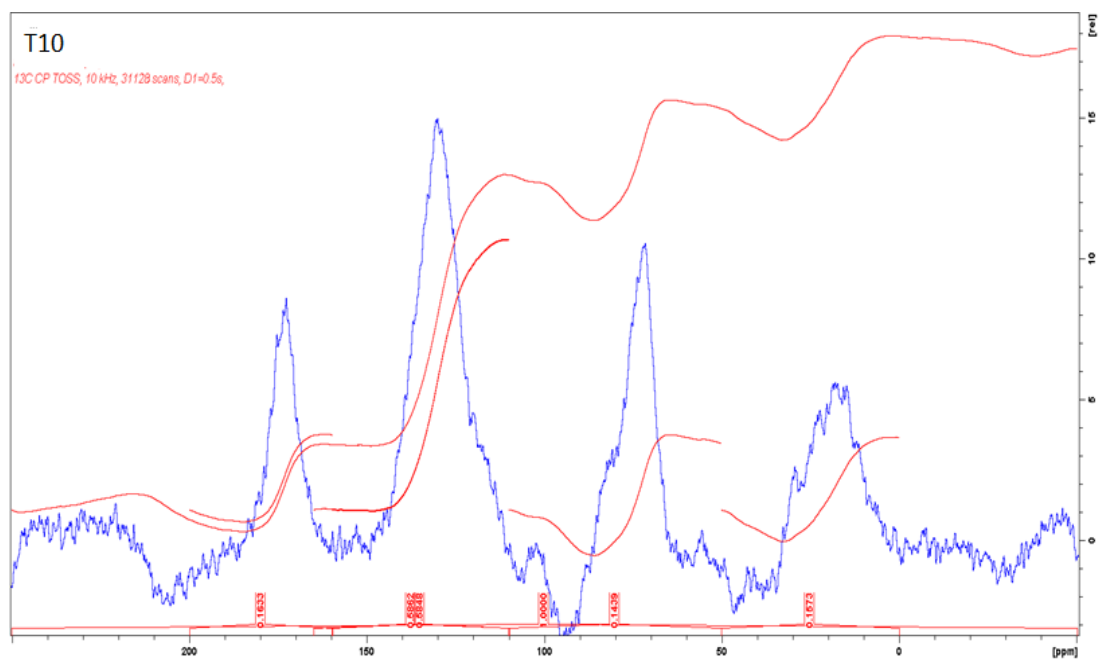

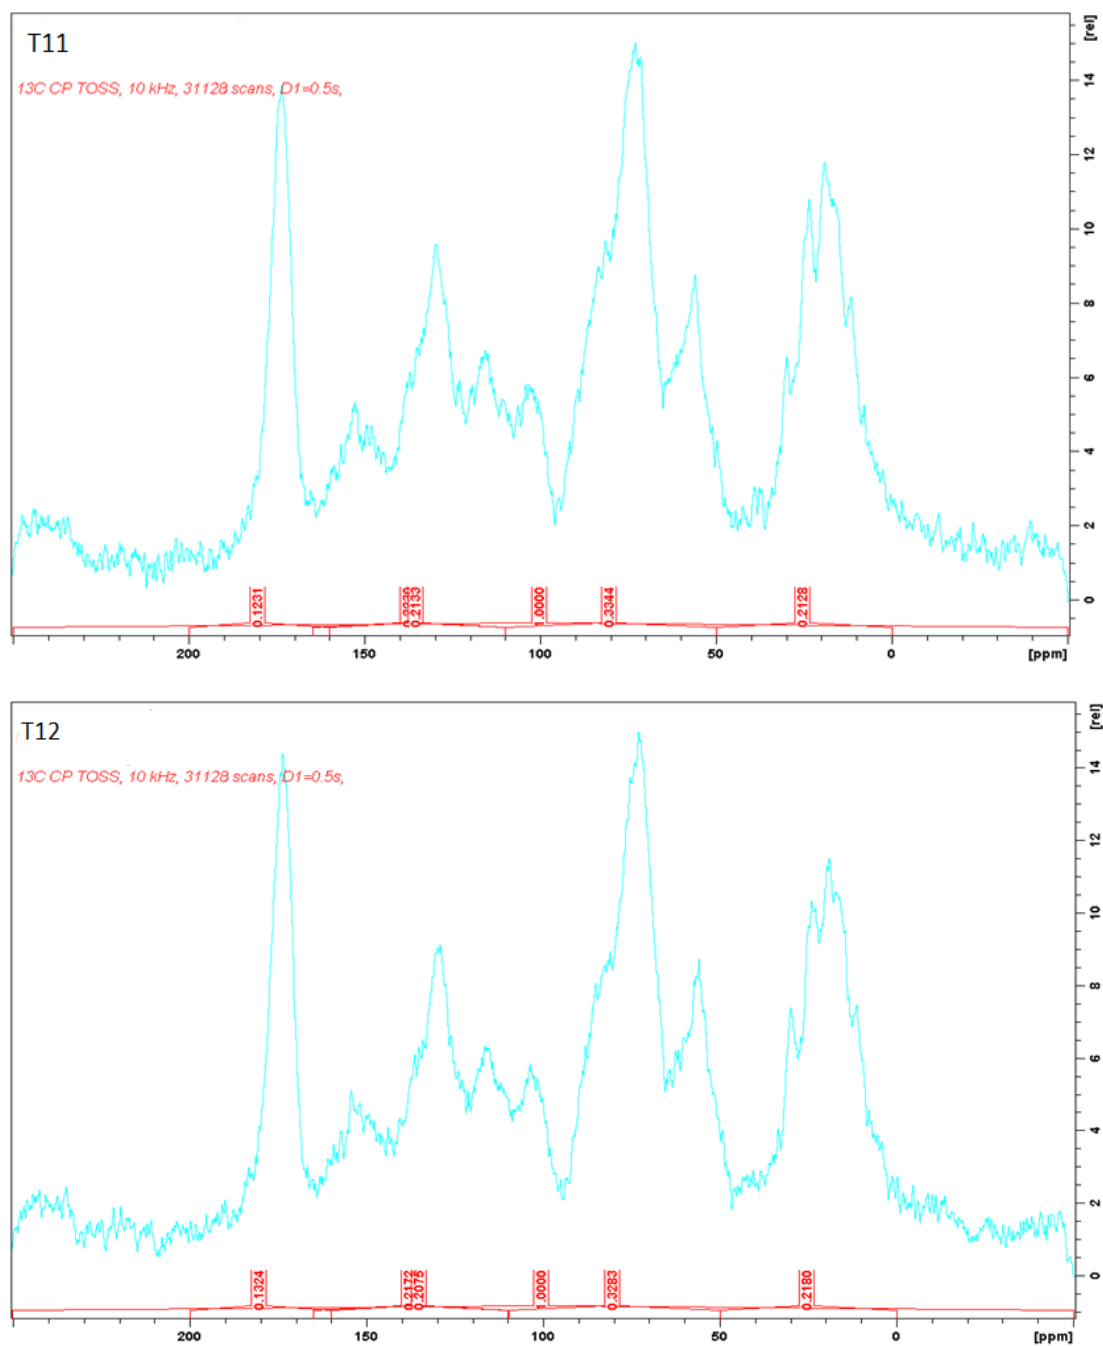

**Figure S1.** Solid-state cross polarisation magic angle spinning nuclear magnetic resonance (CP/MAS  $^{13}\text{C}$ -NMR) spectra of humic acids from soils under different organic treatments. Tn – treatment number: T1 – farmyard manure (FYM, with field age of 0.5 years), T2 – brown coal waste (BCW, 0.5 years), T3 – biochar (BIO, 0.5 years), T4 – FYM (1.5 years), T5 – BCW (1.5 years), T6 – BIO (1.5 years), T7 – no amendment (8 years), T8 – BIO (8 years), T9 – no amendment (94 years), T10 – FYM + Ca (94 years), T11 – no amendment (116 years) and, T12 – FYM (116 years).
